# Supplementary material for: Spin–phonon couplings in transition metal complexes with slow magnetic relaxation
Source: PubMed Central journal article supplement (PMC6030095; doi:10.1038/s41467-018-04896-0), 2018-07-03
Supplement: 41467_2018_4896_MOESM2_ESM.pdf [file 41467_2018_4896_MOESM2_ESM.pdf]

## Description of Additional Supplementary Files

File Name: Supplementary Movie 1

Description: Movie 1 of phonon A in **1-d<sub>4</sub>** at 109.2 cm<sup>-1</sup>

File Name: Supplementary Movie 2

Description: Movie 2 of phonon C in **1-d<sub>4</sub>** at 126.0 cm<sup>-1</sup>

File Name: Supplementary Movie 3

Description: Movie 3 of phonon D in **1-d<sub>4</sub>** at 129.3 cm<sup>-1</sup>

File Name: Supplementary Movie 4

Description: Movie 4 of phonon E in **1-d<sub>4</sub>** at 142.7 cm<sup>-1</sup>

File Name: Supplementary Movie 5

Description: Movie 5 of phonon A in **1-d<sub>18</sub>** at 116.3 cm<sup>-1</sup>
